# Supplementary material for: Indirect Reciprocity; A Field Experiment
Source: PubMed Central journal article supplement (PMC4820101; doi:10.1371/journal.pone.0152076), 2016-04-04
Supplement: pone.0152076.s005.pdf [file pone.0152076.s005.pdf]

**Pictures used for the Profiles.**

|                        | <b>Female &amp; Dutch</b>                                                         | <b>Male &amp; Dutch</b>                                                           | <b>Female &amp; Israeli</b>                                                        | <b>Male &amp; Israeli</b>                                                           |
|------------------------|-----------------------------------------------------------------------------------|-----------------------------------------------------------------------------------|------------------------------------------------------------------------------------|-------------------------------------------------------------------------------------|
| <b>Serving profile</b> |  |  |  |  |
| <b>Neutral profile</b> |  |  |  |  |

\*We were unable to obtain consent to use the picture of the female Israeli assigned with a neutral profile in a publication.
