# Supplementary material for: Indirect Reciprocity; A Field Experiment
Source: PubMed Central journal article supplement (PMC4820101; doi:10.1371/journal.pone.0152076), 2016-04-04
Supplement: pone.0152076.s006.pdf [file pone.0152076.s006.pdf]

## Member Characteristics

This appendix provides evidence that characteristics of members that were selected to receive a service request, are uncorrelated with the type of profile that was used to send the request. To test this, we ran a probit regression of the profile type (a dummy variable equal to 1(0) for a serving (neutral) profile) on the available characteristics of the members that are selected to receive a request. Table S6-1 gives the marginal effects derived from this regression.

**Table S6-1: Probit Regression**

|                        | Serving Profile |       |
|------------------------|-----------------|-------|
| male                   | 0.028           | 0.34  |
| age/100                | 0.006           | 0.54  |
| #providers' references | 0.001           | 0.09  |
| #travelers' references | 0.011           | 1.21  |
| #friends               | -0.008          | 1.75* |
| able to provide        | -0.055          | 0.70  |
| days                   | 0.002           | 0.07  |
| #observations          | 189             |       |

*Notes.* The first number in a cell denotes the marginal effect derived from the probit regression of the variable depicted in the row; the second number gives the corresponding z-value. "Serving profile" = 1(0) if the request was sent from a serving (neutral) profile. The gender and age refer to the member who received the request. "#providers' references" denotes the number of references left by other members that have previously provided the service to the member to whom we sent a service request. "#travelers' references" denotes the number of references left by other members that have previously received the service from the member to whom we sent a service request. "#friends" denotes the number of friends on the profile of the member to whom we sent a service request. "able to provide" = 1 (0) if the profile indicates the availability to offer the service as "yes" ("maybe") (recall that no request can be sent to a member indicating "no"). "Days" indicates the number of days between submission of the request and the day for which the service was requested.  
\*denotes statistical significance at the 10% level.

The results show very small effects of members' characteristics on whether the request is received from a serving profile or a neutral profile. One out of the seven independent variables is statistically significant at the 10%-level, but even here the marginal effect is very small (0.8 %-points).
