# Supplementary material for: Indirect Reciprocity; A Field Experiment
Source: PubMed Central journal article supplement (PMC4820101; doi:10.1371/journal.pone.0152076), 2016-04-04
Supplement: pone.0152076.s007.pdf [file pone.0152076.s007.pdf]

## Service Requests Sent

The following service requests were sent from the two profile types. As before, we replace phrases that identify the specific online community by neutral phrases in [...] and precise texts are available upon request. Words in {} were adjusted to fit the specific person.

Hi .....!

How are you? I'll introduce myself: My name is Floortje, I'm 24 years old and I'm from {country}. I love to travel, and I'm an outdoorsy! I'm pretty new to [this community], but I have [provided the service] a number of times already, as you can see on my profile. I really like to meet people through [community] experiences. Pretty soon I'll be traveling to your city and I'm really excited. I'd love to [use your service] during my stay there. I'll arrive May 22 and leave around May 26. Do you think you could [provide the service to me]? It's ok if you can't [provide it every day]. I hope to hear from you, and I hope we will meet shortly!

Thank you in advance and best regards,

{Name}

Hi .....!

How are you? I'll introduce myself: My name is Floor, I'm 24 years old and I'm from {country}. I love to travel, and I'm an outdoorsy! I'm pretty new to [this community], so I haven't [provided or received the service] yet, as you can see on my profile. I'd really like to meet people through [community] experiences. Pretty soon I'll be traveling to your city and I'm really excited. I'd love to [use your service] during my stay there. I'll arrive May 22 and leave around May 26. Do you think you could provide the service to me]? It's ok if you can't [provide it every day]. I hope to hear from you, and I hope we will meet shortly!

Thank you in advance and best regards,

(Name)
